# Supplementary material for: Systematic approach for wettability prediction using molecular dynamics simulations
Source: Royal Society of Chemistry journal article supplement (doi:10.1039/d0sm00197j), 2020-01-01
Supplement: d0sm00197j1.pdf [file d0sm00197j1.pdf]

# Systematic approach for wettability prediction using molecular dynamics simulations

Ahmed Jarray, Herman Wijshoff, Jurriaan A. Luiken, and Wouter K. den Otter

## S1 Standard deviation and block averaging over longer simulation time

To assess the required simulation times to equilibrate a simulation box and to obtain accurate and reproducible solubility parameters, we performed MD simulations with a duration of 1 ns on randomly selected molecules from the following categories:

- Small molecules: Decane, Triethylsilane, Ethanol, Nonane
- Polymers: PET, POM, PVA
- The largest surfactant: Tergitol

Fig. S1 shows the evolution of the solubility parameter with simulation time block-averaged every 20 ps. The MD simulation starts with an energy minimized configuration, and therefore the solubility parameter rises slightly in the beginning. Only minor variations are observed after about 100 ps, indicating that most systems are at, or close to, equilibrium. Standard deviations of the 20 ps block averages over the interval from 200 ps to 1 ns are included in Table S1. This indicates that an equilibration phase of 180 ps and a sampling duration of 20 ps are acceptable, for the small molecules and polymer fragments considered here, to obtain a reasonable estimate of the solubility parameter. This is consistent with other studies<sup>1-3</sup> where 200 ps was enough to compute the solubility parameter. With this short equilibration and sampling durations, the proposed approach balances accuracy and speed, and thereby enables one to quickly screen a lot of liquids in terms of their wettability.

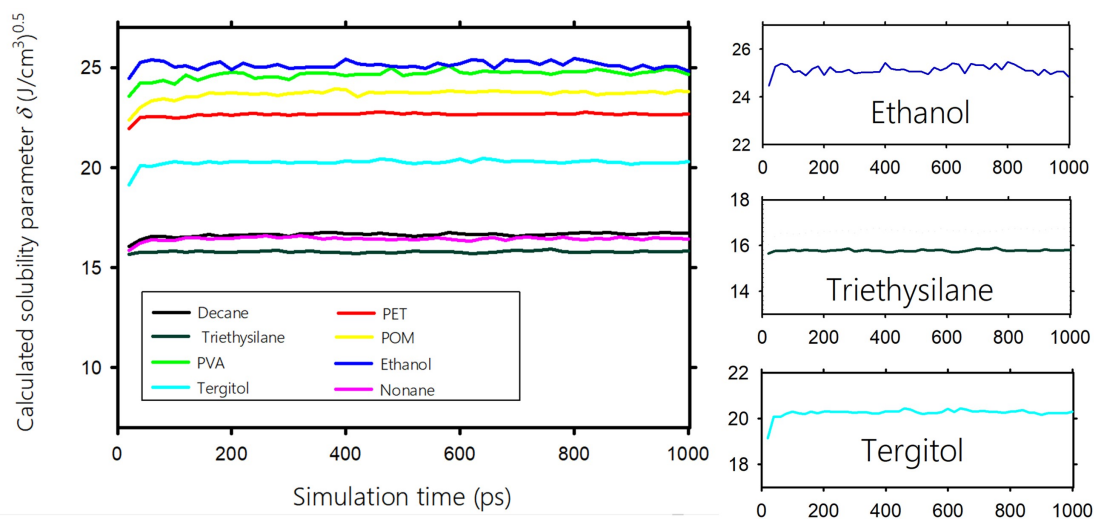

**Fig. S1** Solubility parameter of eight molecules plotted against simulation time and block averaged every 20 ps.

To make sure our results are reproducible, we repeated the preparation procedure described in section 2.2 with 5 different initial configurations for each of these randomly selected molecules. Table S1 shows the results and obtained standard deviations. For the large molecules and polymers the deviation has a maximum range of  $0.23 \text{ (J/cm}^3\text{)}^{0.5}$ , and for small molecules, it is below  $0.17 \text{ (J/cm}^3\text{)}^{0.5}$ .

**Table S1** Standards deviations for eight molecules over the five different initial configurations. All values in  $\text{(J/cm}^3\text{)}^{0.5}$

|                | Solubility parameter |           |           |           |           | Standard deviations |             |
|----------------|----------------------|-----------|-----------|-----------|-----------|---------------------|-------------|
|                | Config. 1            | Config. 2 | Config. 3 | Config. 4 | Config. 5 | 5 Configs.          | 0.2 to 1 ns |
| Decane         | 16.58                | 16.46     | 16.45     | 16.51     | 16.64     | 0.07                | 0.06        |
| Ethanol        | 24.67                | 24.70     | 24.56     | 24.91     | 24.72     | 0.17                | 0.19        |
| Nonane         | 16.90                | 16.51     | 16.68     | 16.72     | 16.46     | 0.15                | 0.15        |
| PET            | 23.08                | 22.62     | 22.92     | 22.81     | 22.49     | 0.21                | 0.10        |
| POM            | 24.26                | 23.88     | 24.08     | 23.69     | 23.72     | 0.22                | 0.11        |
| PVA            | 24.42                | 24.74     | 24.42     | 24.83     | 24.66     | 0.17                | 0.21        |
| Tergitol       | 20.70                | 20.62     | 20.72     | 21.07     | 20.36     | 0.23                | 0.19        |
| Triethylsilane | 15.72                | 15.82     | 15.88     | 15.95     | 15.88     | 0.08                | 0.05        |

Abbreviations: PET: polyethylene terephthalate, POM: polyoxymethylene, and PVA: polyvinyl alcohol.

## S2 Pictorial of all the employed compounds

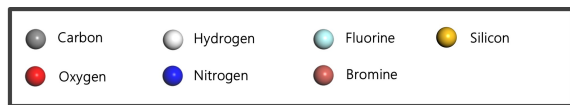

### Polar and H-bonding liquids

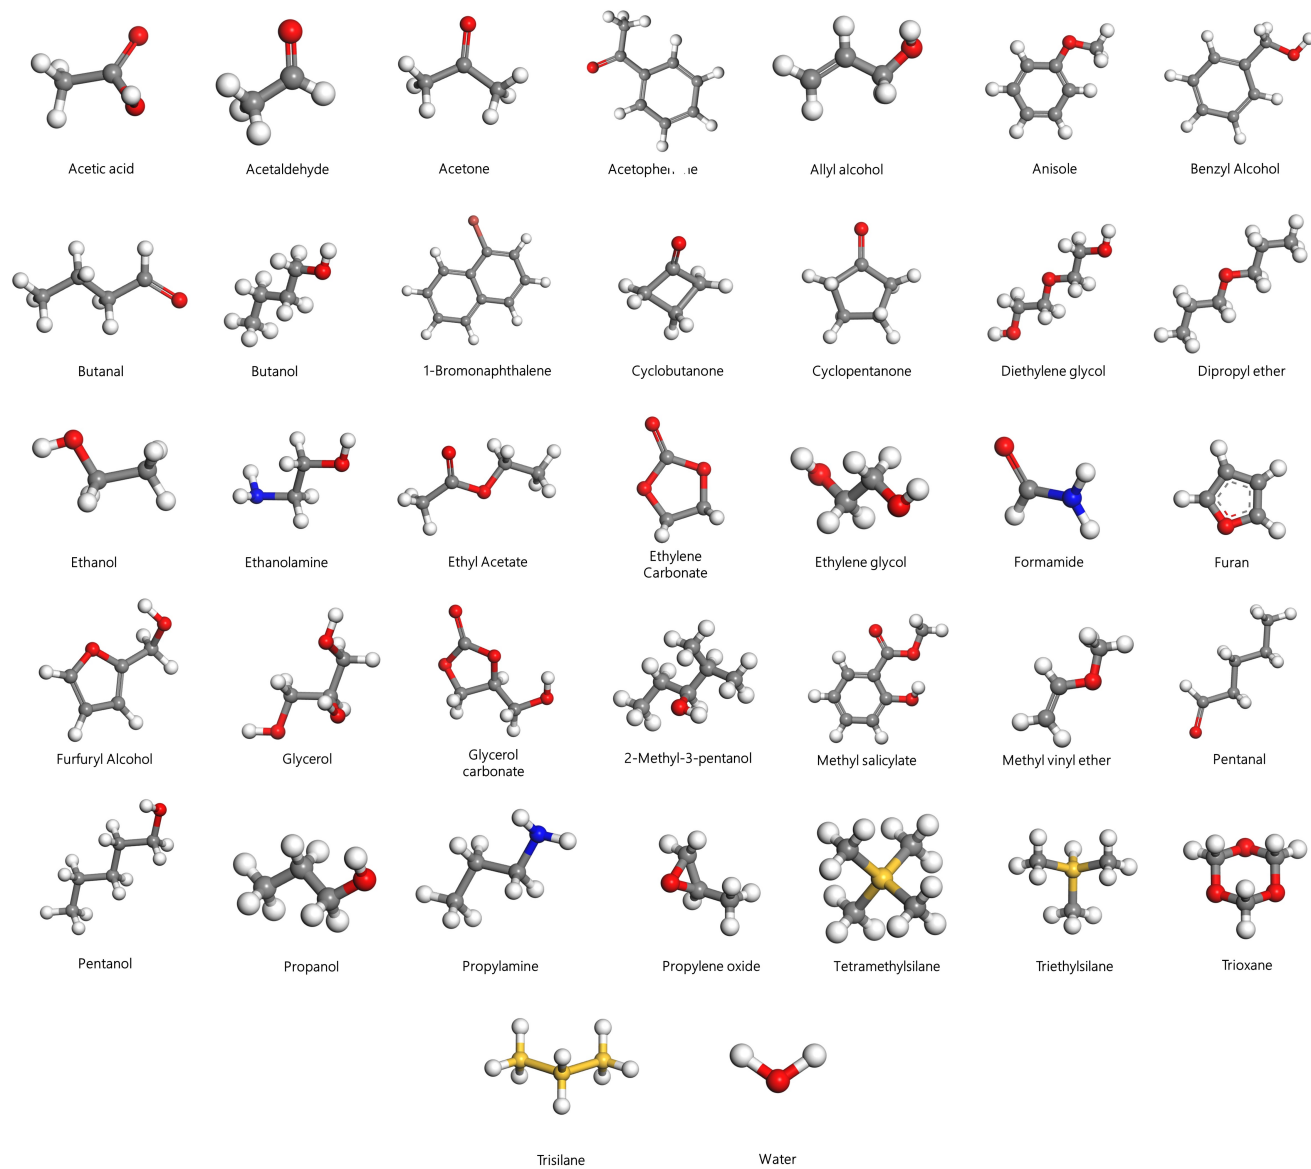

### Surfactants

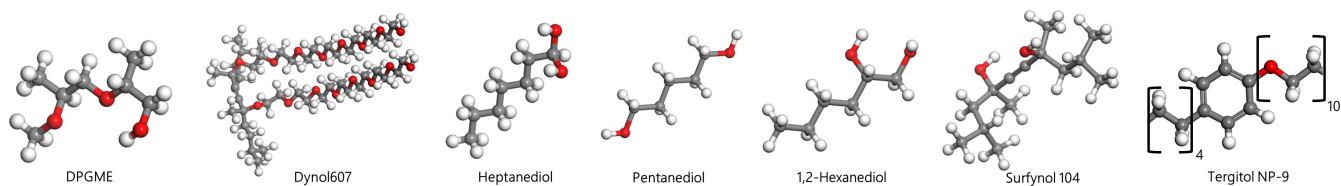

Fig. S2 Molecular structure of the studied liquids, surfactants and polymers.

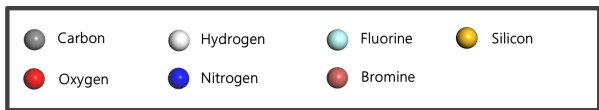

### Polymeric substrates

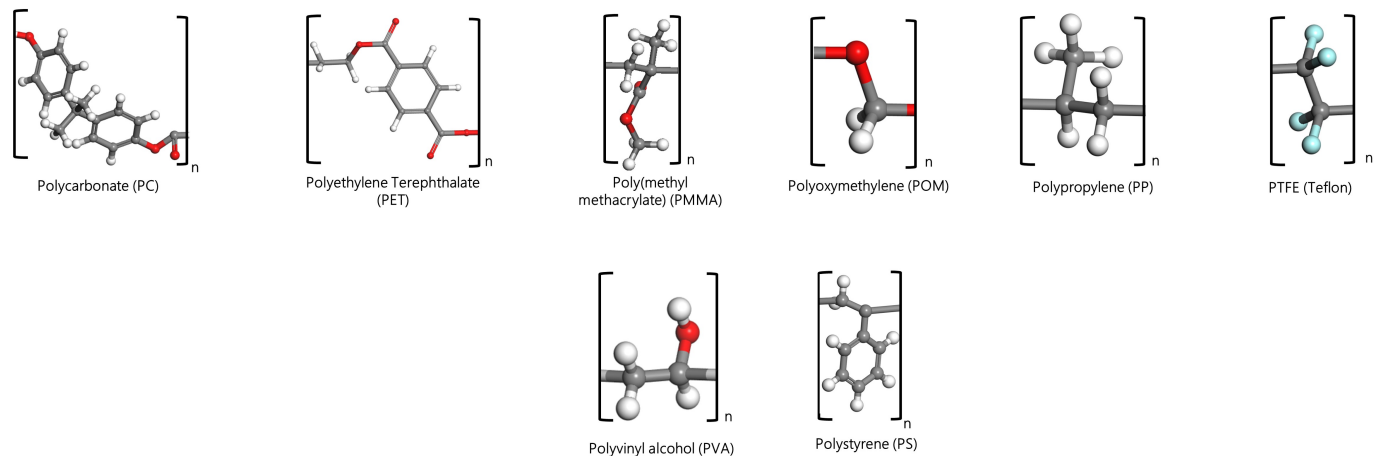

### Hydrocarbons

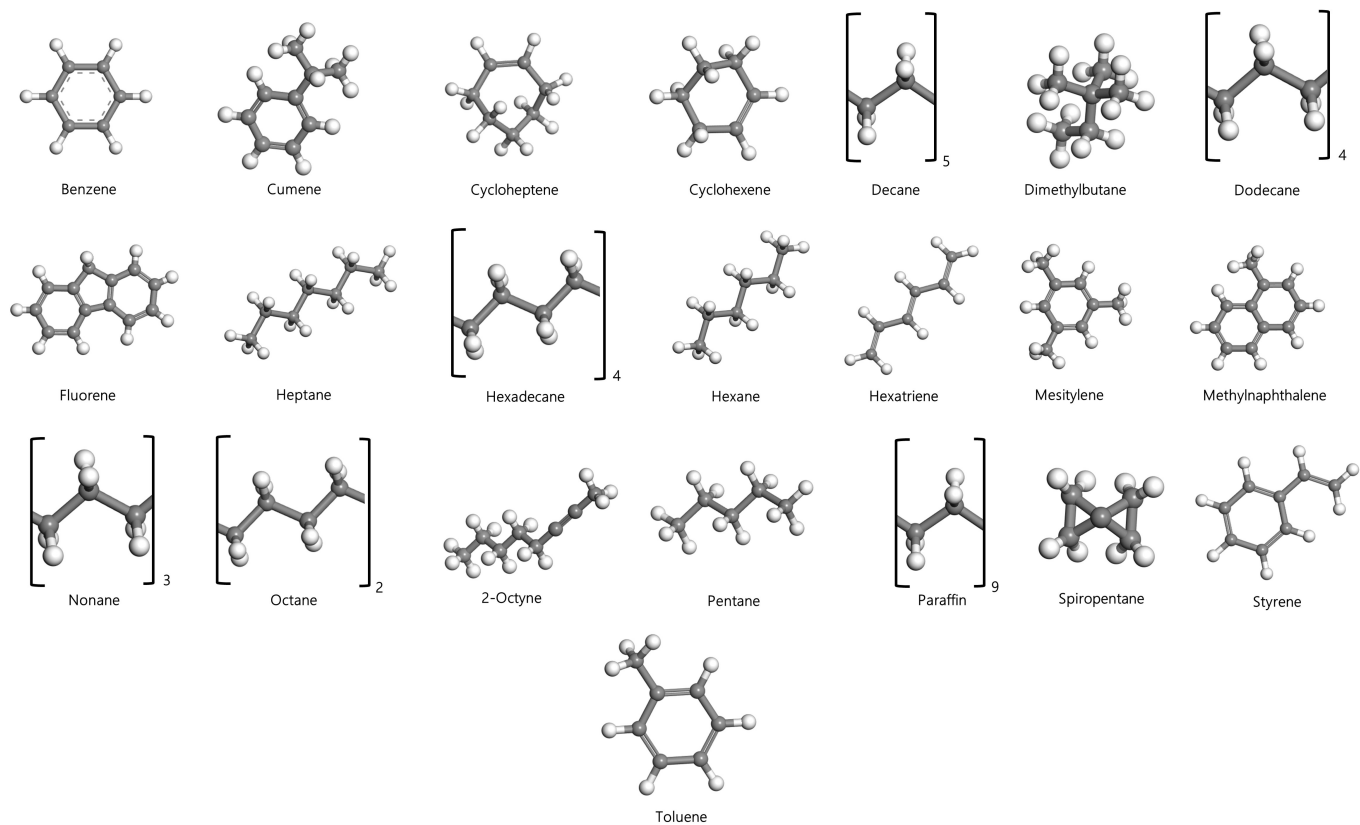

Fig. S2 Continued.

### S3 Surface tensions calculated using a constant probe radius $r_a = 1.4 \text{ \AA}$

Calculated versus experimental values of surface tension obtained using equation (7) are plotted in Fig. S3, where the probe radius for the calculation of the solvent accessible area has a constant value  $r_a = 1.4 \text{ \AA}$ . Results are in good agreement with experiments, with an overall 3% deviation relative to the experimental values.

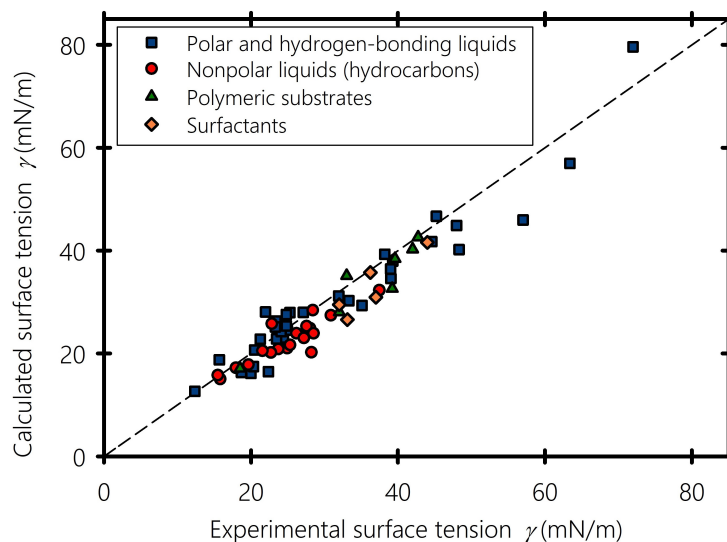

Fig. S3 Calculated versus experimental surface tension obtained using equation (7), with a constant probe radius  $r_a = 1.4 \text{ \AA}$ .

### S4 Surface tension and solubility parameters obtained by the Y-MB method

Solubility parameter obtained using the Yamamoto-Molecular Break (Y-MB) group contribution method<sup>4,5</sup> are provided in Table S3 for all molecules studied in the main text. Comparing with Table 1, we notice that  $\delta_h$  values predicted by Y-MB are often higher than those computed from MD. One explanation is that Y-MB overestimates the hydrogen-bonding contribution of the solubility parameter, as pointed out by Levin et al.<sup>6</sup> Re-fitting Equation (7) with the solubility parameters obtained by Y-MB gave  $b = 0.4577$  and  $\alpha = 0.5448$ . These were used to plot the experimental versus calculated surface tensions in Fig. S4. Surface tensions obtained using solubility parameter values from Y-MB method agrees well with experiments for the case of hydrocarbons and some liquids such as glycerol, Furan and cyclobutanone. For the other liquids and polymers, the calculated surface tension shows higher deviations comparing to experiments.

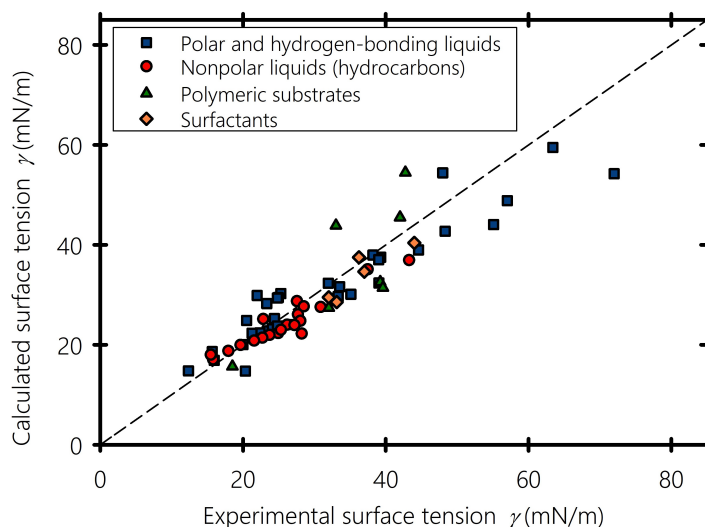

Fig. S4 Calculated versus experimental surface tensions obtained using our equation (7), where the Y-MB method is used to calculate the solubility parameters. The values  $\alpha = 0.5448$  and  $b = 0.4577$  were obtained by re-fitting Equation 7.

**Table S2** Experimental and computed solubility parameters in  $(\text{J}/\text{cm}^3)^{0.5}$  obtained using Y-MD method, along with the experimental and calculated surface tensions (mN/m) at 298.15 K, obtained using equation (7).

|                                    | Y-MB     |            |            |            | Exp.                   | Calculated                        |
|------------------------------------|----------|------------|------------|------------|------------------------|-----------------------------------|
|                                    | $\delta$ | $\delta_d$ | $\delta_p$ | $\delta_h$ | $\gamma^{**}$          | $\gamma$ using Eq. 7 <sup>‡</sup> |
| <b>Polar and H-bonding liquids</b> |          |            |            |            |                        |                                   |
| Acetic acid                        | 21.4     | 15.2       | 6.6        | 13.6       | 27.1                   | 24.0                              |
| Acetaldehyde                       | 21.7     | 15.8       | 12.0       | 8.8        | 20.5                   | 24.8                              |
| Acetone                            | 19.3     | 15.7       | 9.1        | 6.5        | 23.5–25.2 <sup>∇</sup> | 22.8                              |
| Acetophenone                       | 20.4     | 18.7       | 6.8        | 4.5        | 38.9–39.1 <sup>∇</sup> | 32.4                              |
| Allyl alcohol                      | 23.8     | 16.2       | 8.0        | 15.5       | 25.3                   | 30.3                              |
| Anisole                            | 19.7     | 18.3       | 4.9        | 5.6        | 35.1                   | 30.1                              |
| Benzyl alcohol                     | 23.5     | 19.0       | 6.0        | 12.5       | 39.3                   | 37.5                              |
| 1-Bromonaphthalene                 | 21.5     | 20.3       | 4.7        | 5.1        | 44.6                   | 38.9                              |
| Butanal                            | 18.9     | 15.7       | 8.5        | 6.1        | 24.3 <sup>◊</sup>      | 23.3                              |
| Butanol                            | 22.6     | 15.8       | 6.4        | 14.8       | 24.9–25.7 <sup>∇</sup> | 29.4                              |
| Cyclobutanone                      | 22.7     | 18.4       | 11.8       | 6.1        | 31.9                   | 32.3                              |
| Cyclopentanone                     | 20.6     | 18.0       | 8.6        | 5.1        | 33.3                   | 29.7                              |
| Diethylene glycol                  | 29.1     | 17.4       | 11.0       | 20.6       | 45.2                   | 44.1                              |
| Dipropyl ether                     | 15.9     | 15.1       | 3.5        | 3.5        | 20.0                   | 20.0                              |
| Ethanol                            | 25.0     | 15.6       | 9.3        | 17.2       | 22.0                   | 29.8                              |
| Ethanolamine                       | 29.6     | 17.8       | 10.3       | 21.3       | 48.3                   | 42.7                              |
| Ethylene carbonate                 | 18.0     | 22.4       | 9.3        | 1.3        |                        | 40.7                              |
| Ethyl acetate                      | 18.5     | 15.7       | 6.3        | 7.5        | 23.4                   | 22.8                              |
| Ethylene glycol                    | 35.3     | 17.8       | 13.5       | 27.4       | 48.0                   | 54.4                              |
| Formamide                          | 34.5     | 17.7       | 21.5       | 20.5       | 57.0                   | 48.8                              |
| Furan                              | 18.3     | 16.7       | 4.9        | 5.8        | 24.1                   | 23.2                              |
| Furfuryl alcohol                   | 25.1     | 18.6       | 8.7        | 14.5       | 38.2                   | 38.0                              |
| Glycerol                           | 35.7     | 18.3       | 12.7       | 27.8       | 63.4                   | 59.5                              |
| Glycerol carbonate                 | 32.0     | 18.5       | 21.8       | 14.5       |                        | 52.2                              |
| 2-Methyl-3-pentanol                | 18.9     | 15.6       | 4.6        | 9.6        | 24.4                   | 25.2                              |
| Methyl salicylate                  | 22.9     | 18.7       | 8.7        | 10.2       | 39.0                   | 37.0                              |
| Methyl vinyl ether                 | 16.7     | 14.9       | 5.6        | 5.2        | 15.7                   | 18.6                              |
| Pentanal                           | 18.5     | 15.8       | 7.6        | 5.8        | 24.8–25.4 <sup>∇</sup> | 23.8                              |
| Pentanol                           | 21.7     | 16.0       | 5.8        | 13.6       | 25.4–26.7 <sup>∇</sup> | 29.3                              |
| Propanol                           | 22.6     | 15.7       | 7.3        | 14.6       | 23.3                   | 28.2                              |
| Propylamine                        | 18.5     | 15.7       | 5.2        | 8.3        | 21.7–22.4 <sup>∇</sup> | 22.4                              |
| Propylene oxide                    | 18.9     | 15.8       | 7.5        | 7.0        | 24.5                   | 22.3                              |
| Tetramethylsilane                  | 13.2     | 12.9       | 1.7        | 2.0        | 12.3                   | 14.8                              |
| Triethylsilane                     | 13.4     | 13.1       | 1.9        | 1.9        | 20.3                   | 14.7                              |
| Trioxane                           | 23.0     | 17.8       | 10.8       | 9.7        |                        | 31.6                              |
| Trisilane                          | 13.7     | 13.7       | 1.2        | 0.1        | 18.7 <sup>◊</sup>      | 16.9                              |
| Water                              | 47.9     | 0.0        | 38.8       | 24.5       | 72.0                   | 54.2                              |
| <b>Surfactants</b>                 |          |            |            |            |                        |                                   |
| DPGME                              | 20.1     | 16.2       | 6.4        | 9.9        |                        | 28.5                              |
| Dynol607                           | 17.2     | 15.7       | 4.7        | 5.4        |                        | 29.5                              |
| Heptanediol                        | 23.4     | 16.5       | 6.9        | 15.1       | 37.0                   | 34.6                              |
| 1,2-Hexanediol                     | 25.2     | 16.7       | 7.1        | 17.5       | 36.2                   | 37.5                              |
| Pentanediol                        | 26.9     | 17.0       | 8.9        | 18.9       | 44.0                   | 40.4                              |
| Surfynol 104                       | 18.3     | 16.4       | 3.7        | 7.2        | 33.1                   | 28.5                              |
| Tergitol NP-9                      | 19.0     | 16.3       | 7.7        | 5.9        | 32.0                   | 29.5                              |
| <b>Polymeric substrates</b>        |          |            |            |            |                        |                                   |
| PC                                 | 21.3     | 18.9       | 5.1        | 8.4        | 42.7                   | 54.5                              |
| PET                                | 23.1     | 19.6       | 11.7       | 3.6        | 40.0–43.0 <sup>∇</sup> | 45.5                              |
| PMMA                               | 16.9     | 16.2       | 1.6        | 4.7        | 39.2                   | 32.6                              |

Abbreviation: PC: polycarbonate, PET: polyethylene terephthalate, PMMA: polymethyl methacrylate, POM: polyoxymethylene, and DPGME: di(propylene glycol) methyl ether.

<sup>◊</sup> Surface tensions at 293.15 K.

\*\* Experimental surface tension values are obtained from Refs. 7–13.

<sup>∇</sup> Dispersed experimental values in the literature.

<sup>‡</sup> Equation (7) with a probe radius that depends on the atom types of the molecules.

**Table S2** Continued.

|                             | Y-MB     |            |            |            | Exp.                   | Calculated                        |
|-----------------------------|----------|------------|------------|------------|------------------------|-----------------------------------|
|                             | $\delta$ | $\delta_d$ | $\delta_p$ | $\delta_h$ | $\gamma^{**}$          | $\gamma$ using Eq. 7 <sup>‡</sup> |
| <b>Polymeric substrates</b> |          |            |            |            |                        |                                   |
| POM                         | 20.5     | 16.8       | 9.8        | 6.4        | 38.0–39.6 <sup>∇</sup> | 31.4                              |
| PP                          | 16.3     | 16.2       | 0.5        | 1.9        | 29.6–32.0 <sup>∇</sup> | 27.4                              |
| PS                          | 18.8     | 18.7       | 0.6        | 2.1        | 33.0–36.0 <sup>∇</sup> | 43.9                              |
| PTFE                        | 12.5     | 12.5       | 0.5        | 0.2        | 18.5                   | 15.7                              |
| PVA                         | 34.4     | 19.3       | 10.4       | 26.5       | 37.0                   | 73.2                              |
| <b>Hydrocarbons</b>         |          |            |            |            |                        |                                   |
| Benzene                     | 16.6     | 16.6       | 0.1        | 0.1        | 28.2                   | 22.3                              |
| Cumene                      | 17.4     | 17.1       | 1.8        | 2.3        | 27.7                   | 26.1                              |
| Cycloheptene                | 17.3     | 16.8       | 2.2        | 3.4        | 28.0 <sup>◊</sup>      | 24.78                             |
| Cyclohexene                 | 17.3     | 16.8       | 2.1        | 3.5        | 26.2                   | 24.0                              |
| Decane                      | 15.6     | 15.6       | 0.1        | 0.1        | 23.7                   | 22.0                              |
| Dimethylbutane              | 14.2     | 14.1       | 0.1        | 0.1        | 15.8                   | 17.1                              |
| Dodecane                    | 15.8     | 15.8       | 0.1        | 0.1        | 25.3                   | 23.0                              |
| Fluorene                    | 20.4     | 20.0       | 2.8        | 2.8        | 43.3                   | 36.9                              |
| Heptane                     | 15.2     | 15.2       | 0.1        | 0.1        | 19.6                   | 19.9                              |
| Hexadecane                  | 15.9     | 15.9       | 0.1        | 0.1        | 27.2                   | 23.9                              |
| Hexane                      | 14.9     | 14.9       | 0.1        | 0.1        | 17.9                   | 18.7                              |
| Hexatriene                  | 16.7     | 16.0       | 2.5        | 4.3        |                        | 21.8                              |
| Mesitylene                  | 18.4     | 17.9       | 2.9        | 3.1        | 27.5                   | 28.7                              |
| Methylnaphthalene           | 20.1     | 19.5       | 3.1        | 4.1        | 37.5                   | 35.1                              |
| Nonane                      | 15.5     | 15.5       | 0.1        | 0.1        | 22.7                   | 21.4                              |
| Octane                      | 15.4     | 15.4       | 0.1        | 0.1        | 21.5                   | 20.8                              |
| 2-Octyne                    | 16.5     | 15.9       | 3.4        | 2.9        | 23.9                   | 22.3                              |
| Pentane                     | 14.8     | 14.8       | 0.1        | 0.1        | 15.5                   | 18.0                              |
| Paraffin oil                | 15.9     | 15.9       | 0.1        | 0.1        | 27.7–28.9 <sup>∇</sup> | 24.2                              |
| Spiropentane                | 17.8     | 17.8       | 0.1        | 0.1        | 22.8                   | 25.1                              |
| Styrene                     | 18.3     | 17.8       | 2.5        | 3.5        | 30.9 <sup>◊</sup>      | 27.6                              |
| Toluene                     | 18.5     | 18.0       | 2.6        | 3.3        | 28.5                   | 27.7                              |

Abbreviation: PP: polypropylene, PTFE: polytetrafluoroethylene, PS: polystyrene, and PVA: polyvinyl alcohol.

<sup>◊</sup> Surface tensions at 293.15 K.

\*\* Experimental surface tension values are obtained from Refs. 7–13.

<sup>∇</sup> Dispersed experimental values in the literature.

<sup>‡</sup> Equation (7) with a probe radius that depends on the atom types of the molecules.

## S5 Tabulated summary of contact angles

Table S3 summarizes contact angles of various liquids on polymeric substrates in degrees ( $^{\circ}$ ). Experimental values are gathered from literature, calculated values are obtained using equation (10).

**Table S3** Experimental and computed contact angles in degrees ( $^{\circ}$ ).

|                  | PMMA            |                  | PTFE            |                  | PP              |                  | PC              |                  | PET             |                  | POM             |                  | PVA             |                  | PS              |                  |
|------------------|-----------------|------------------|-----------------|------------------|-----------------|------------------|-----------------|------------------|-----------------|------------------|-----------------|------------------|-----------------|------------------|-----------------|------------------|
|                  | $\theta_{exp.}$ | $\theta_{calc.}$ |
| Water            | 76              | 79.7             | 111             | 116.8            | 101             | 108.2            | 91              | 83.0             | 79.9            | 80.83            | 72.1            | 75.9             | 73.4            | 70.4             | 88.0            | 100.8            |
| Glycerol         | 71              | 68.8             | 104             | 112.4            | 92              | 105.9            | 80              | 73.8             | 68.1            | 70.7             | 69.7            | 64.1             | 60.3            | 56.6             | 77.0            | 94.7             |
| Ethylene glycol  | 55              | 53.0             | 92              | 101.8            | 67              | 93.3             | 63              | 54.9             | 50.8            | 52.8             | 54.6            | 46.8             | 32.1            | 37.7             | 62.7            | 80.3             |
| Formamide        | 56              | 56.8             | 99              | 105.3            | 84              | 97.6             | 69              | 61.6             | 60.0            | 58.5             | 55.5            | 51.4             | 32.3            | 43.2             | 66.0            | 84.8             |
| Bromonaphthalene | 31              | 50.7             | 76              | 77.1             | 49              | 60.9             | 12              | 12.3             |                 | 32.5             |                 | 49.4             |                 | 56.2             |                 | 42.3             |
| Heptane          | 0               | 0                | 24              | 26.8             | 0               | 0                | 0               | 0                |                 | 0                |                 | 0                |                 | 0                |                 | 0                |
| Octane           | 0               | 0                | 29              | 35.6             | 0               | 0                | 0               | 0                |                 | 0                |                 | 0                |                 | 9.7              |                 | 0                |
| Nonane           | 0               | 0                | 35              | 38.8             | 0               | 0                | 0               | 0                |                 | 0                |                 | 0                |                 | 18.7             |                 | 0                |
| Decane           | 0               | 0                | 39              | 41.5             | 0               | 0                | 0               | 0                |                 | 0                |                 | 0                |                 | 23.4             |                 | 0                |
| Dodecane         | 0               | 0                | 44              | 44.2             | 0               | 0                | 0               | 0                |                 | 0                |                 | 0                |                 | 27.3             |                 | 0                |
| Hexadecane       | 0               | 10.7             | 48              | 48.3             | 0               | 0                | 0               | 0                |                 | 0                |                 | 5.6              |                 | 33.9             |                 | 0                |
| Paraffin         | 25              | 30.8             | 62              | 54               | 23              | 18.7             | 0               | 0                |                 | 0                |                 | 29.6             |                 | 45.0             |                 | 0                |

Abbreviations: PMMA: polymethyl methacrylate, PTFE: polytetrafluoroethylene, PP: polypropylene, PC: polycarbonate, PET: polyethylene terephthalate, POM: polyoxymethylene, PS: polystyrene, and PVA: polyvinyl alcohol.

Experimental contact angle values are gathered from Refs. 10,14,15, where the sessile drop method and the one-liquid contact angle method were used.

## S6 Labeled Figures of the surface tension and contact angle

Figures S5 and S6 show labeled versions of Figures 6 (b) and 7, specifying the various liquids.

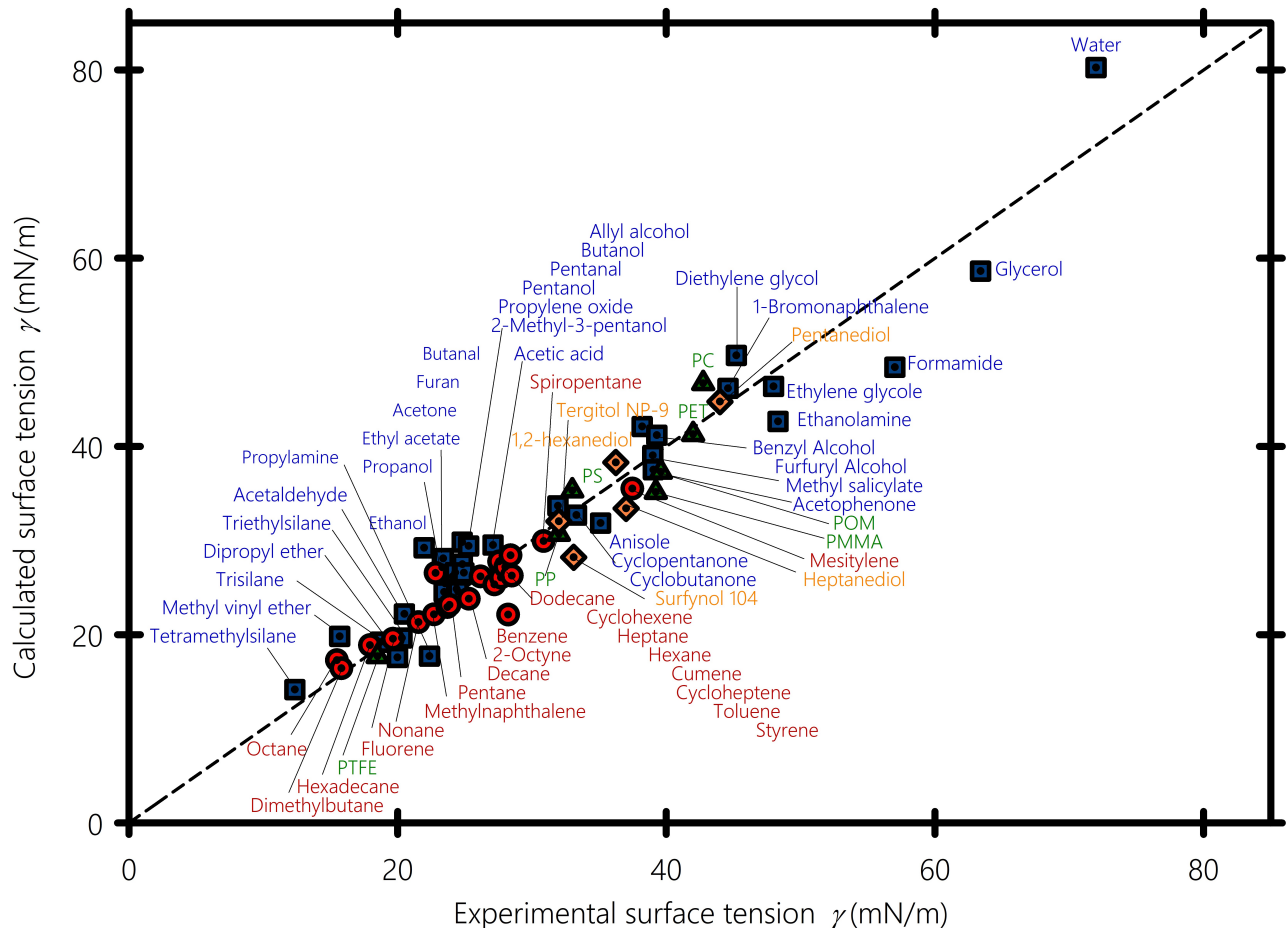

**Fig. S5** Calculated versus experimental surface tensions obtained using our equation (7), where each liquid is labeled.

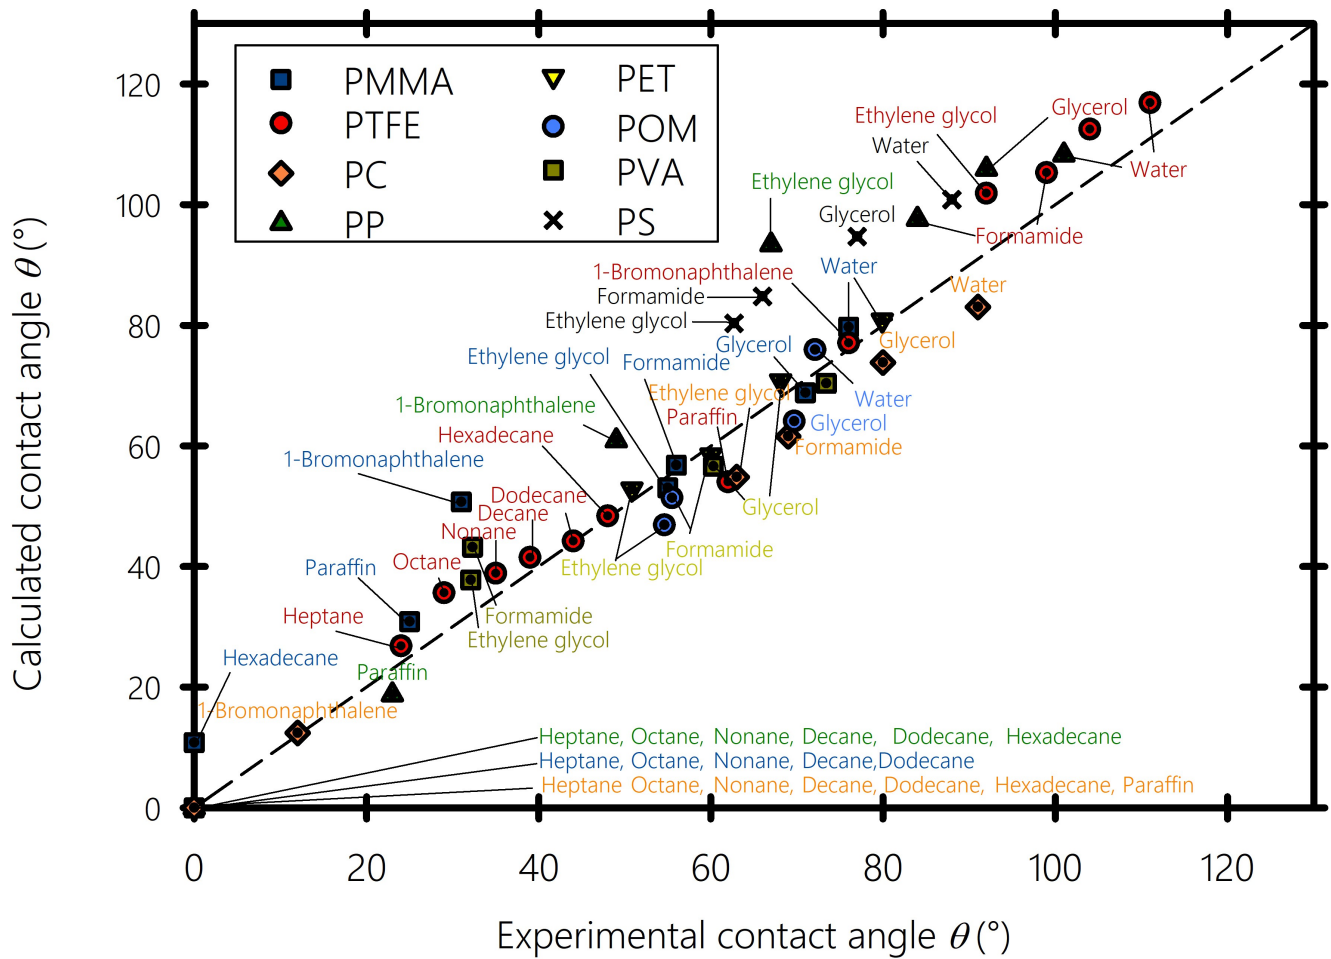

**Fig. S6** Experimental versus calculated contact angles of liquids on different polymeric substrates. PMMA: polymethyl methacrylate, PTFE: polytetrafluoroethylene, PP: polypropylene, PC: polycarbonate, PET: polyethylene terephthalate, POM: polyoxymethylene, PS: polystyrene and PVA: polyvinyl alcohol.



## S7 Contact angles and wetting graph of liquids on PS and PP

In Fig. S10, the experimental versus calculated contact angles of highly polar liquids on polystyrene and polypropylene are plotted. For these liquids on these two overwhelmingly dispersive polymers, and for these two only, we curiously find that using the total solubility parameter

$$\cos \theta = -1 + 2 \sqrt{\frac{V_a^s S_a^f \delta^s}{V_a^f S_a^s \delta^f}}, \quad (\text{S1})$$

gives better results than using its components.

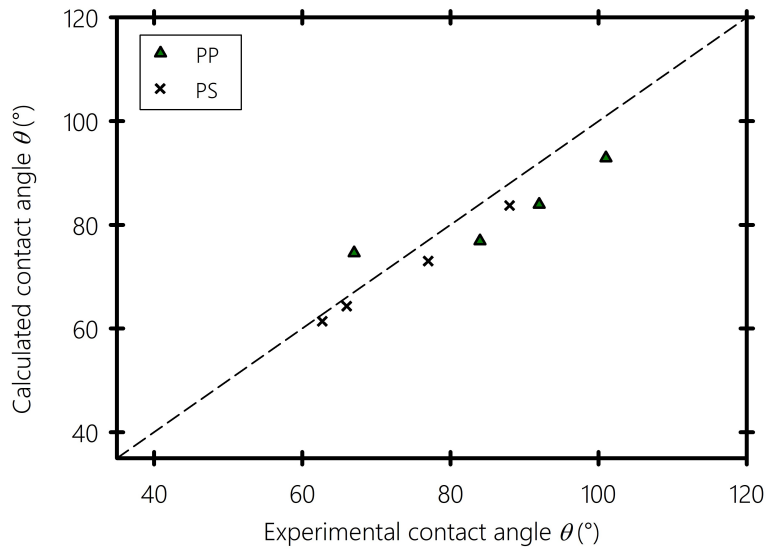

**Fig. S7** Experimental versus calculated contact angles of highly polar liquids on polystyrene (PS) and polypropylene (PP).

When using equation (S1), one can use a 1D wettability graph rather than a 3D sphere to identify wetting and non wetting liquids. We show in Fig. S8 the 1D wettability graphs of PP and PS. Liquids positioned to the left of the blue line completely spread on the polymer, those between the red and the blue lines tend to partially spread, and liquids placed to the right of the red line dewet the substrate. Notice that for the case of PP, the only dewetting liquids (in black dots) are water and glycerol, and no liquid dewets PS, which corresponds to the experimental data.

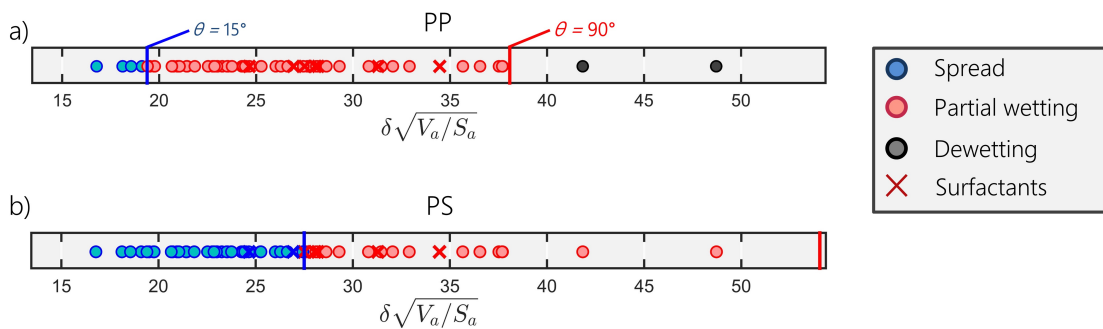

**Fig. S8** 1D wettability graph of a) polypropylene (PP) and b) polystyrene (PS). All data are in  $(\text{J}/\text{cm}^2)^{1/2}$ .

## S8 Wetting spheres of the remaining polymers

Figures S9, S10 and S11 shows the wetting sphere of the polymers. In contrast to PTFE shown in Fig. 9 of the paper, most liquids tend to spread on PMMA as shown in Fig. S9. There is no red sphere in this case since all liquids have a contact angle below  $90^\circ$  (i.e., there is no dewetting). All alkanes are inside the blue sphere and tend to spread, and only highly polar liquids partially wet PMMA. Equation S2 is the spherical Pythagorean form of equation (10), from which the radius and center of the wettability sphere are readily extracted:

$$\left(x_d^l - \frac{x_d^s}{a}\right)^2 + \sqrt{b} \left(x_p^l - \frac{x_p^s}{a}\right)^2 + \sqrt{b} \left(x_h^l - \frac{x_h^s}{a}\right)^2 = \frac{V_a^s}{S_a^s} \left(\frac{\delta^s}{a}\right)^2, \quad (\text{S2})$$

with

$$x_k = \delta_k \sqrt{\frac{V_a}{S_a}}, \quad \text{and} \quad a = \cos \theta + 1, \quad (\text{S3})$$

where  $k$  runs over the dispersive, Coulombic and hydrogen-bonding energies.

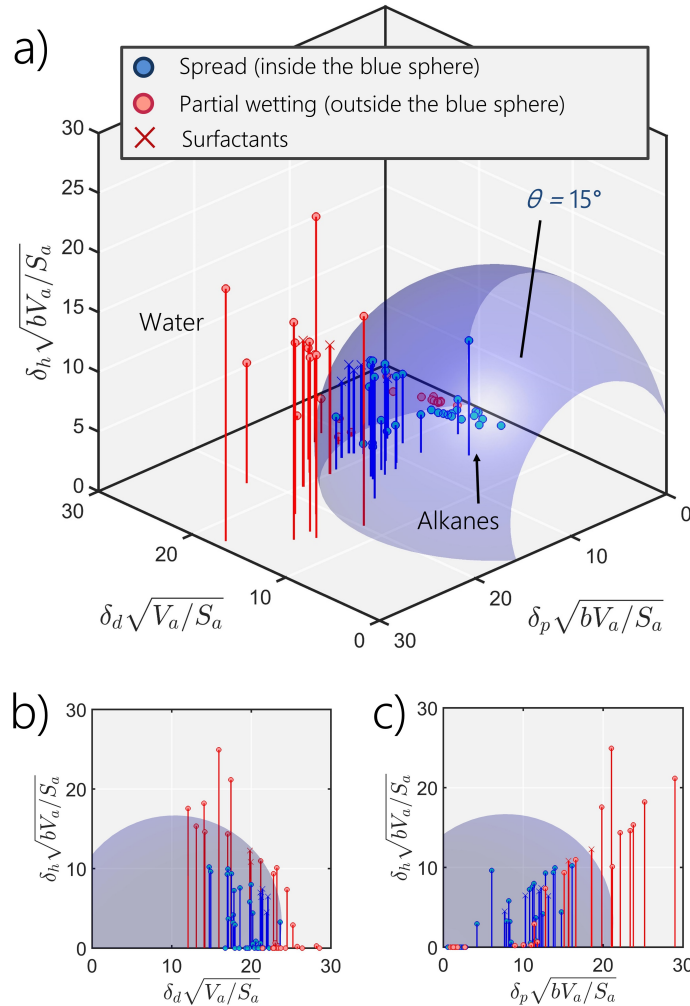

**Fig. S9** Wettability sphere for PMMA, a) 3D view of the sphere, b) projection on the hydrogen-bonding-dispersive plan, and c) projection on the hydrogen-bonding-polar plan. All data are in  $(\text{J}/\text{cm}^2)^{1/2}$ . Liquids whose coordinates are inside the blue sphere spread on PMMA, while those outside it partially spread on PMMA.

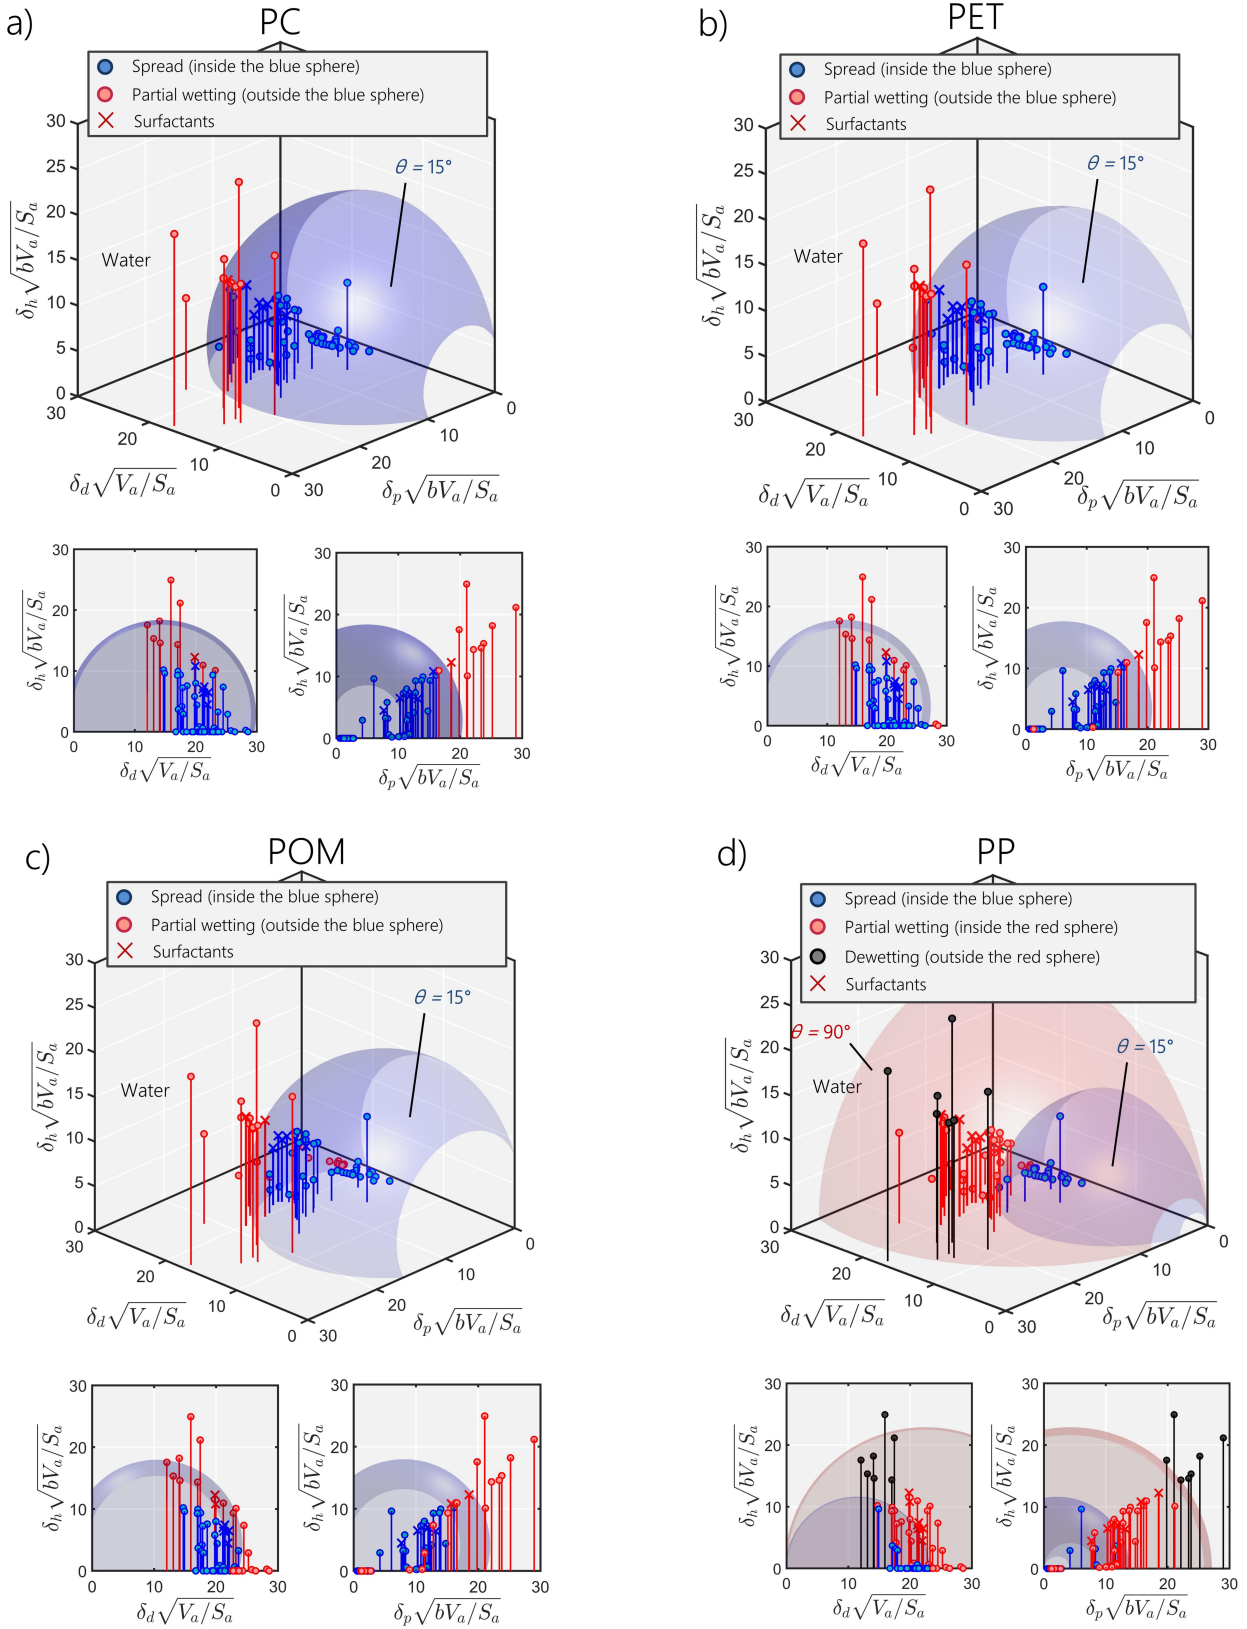

**Fig. S10** Wettability spheres of, a) PC: polycarbonate, b) PET: polyethylene terephthalate, c) POM: polyoxymethylene, and d) PP: polypropylene. All data are in  $(\text{J}/\text{cm}^2)^{1/2}$ .

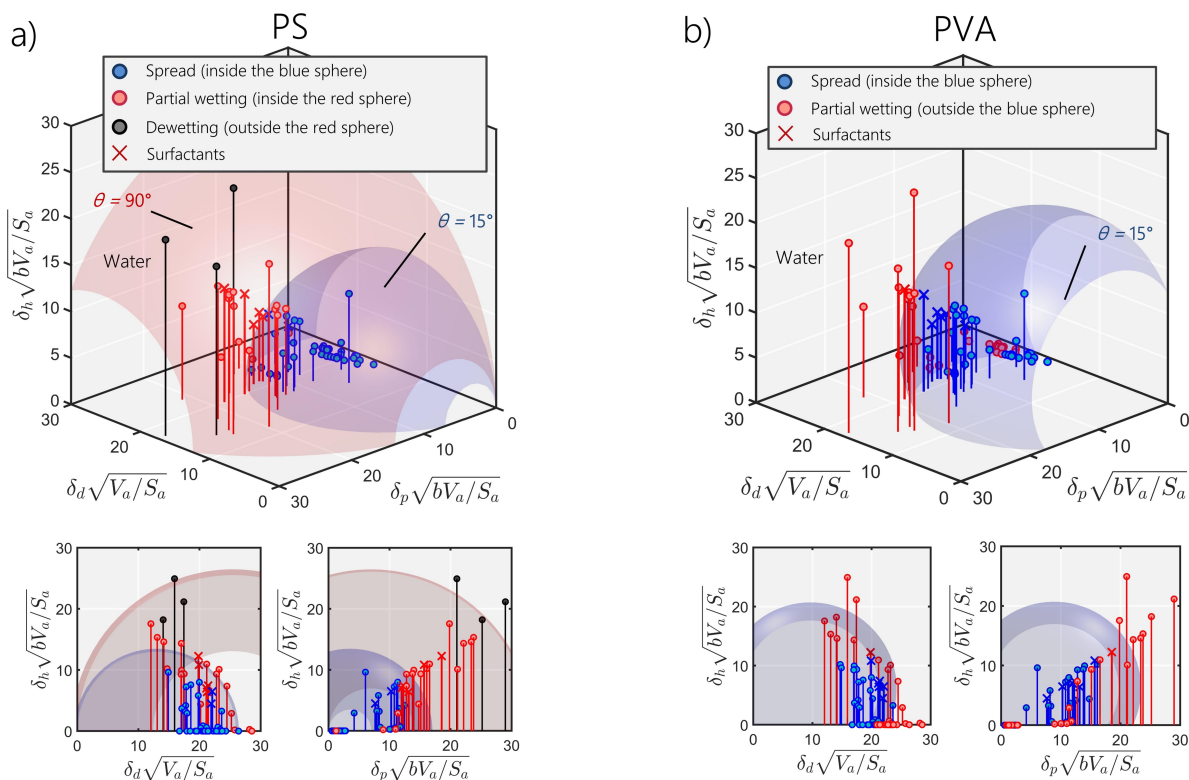

Fig. S11 Wettability sphere of, a) PS: polystyrene and b) PVA: polyvinyl alcohol. All data are in  $(\text{J}/\text{cm}^2)^{1/2}$ .

## References

- 1 F. Frigerio and D. Molinari, *Comput. Theor. Chem.*, 2011, **975**, 76–82.
- 2 J. Yang, X. Gong and G. Wang, *Comput. Mater. Sci.*, 2015, **102**, 1–6.
- 3 S. Sridhar, B. Smitha, S. Mayor, B. Prathab and T. Aminabhavi, *J. Mater. Sci.*, 2007, **42**, 9392–9401.
- 4 H. Yamamoto, *JCPE Journal*, 1999, **11**, 65–76.
- 5 C. Hansen, S. Abbott and H. Yamamoto, *HSPiP Software. Hansen solubility parameters web site*, 2014.
- 6 M. Levin and P. Redelius, *Energy Fuels*, 2012, **26**, 7243–7250.
- 7 M. Lechner, C. Wohlfarth and B. Wohlfarth, *Surface tension of pure liquids and binary liquid mixtures*, Springer, 2015.
- 8 C. L. Yaws, *Thermophysical properties of chemicals and hydrocarbons*, William Andrew, 2008.
- 9 R. C. Weast, M. J. Astle, W. H. Beyer *et al.*, *CRC handbook of chemistry and physics*, CRC press Boca Raton, FL, 1988, vol. 69.
- 10 O. Ozkan and H. Y. Erbil, *Surf. Topogr. Metrol. Prop.*, 2017, **5**, 024002.
- 11 E. W. Flick, *Industrial solvents handbook*, 1998.
- 12 D. R. Lide, *CRC handbook of chemistry and physics: a ready-reference book of chemical and physical data*, CRC press, 1995.
- 13 S. Wu, *Polymer interface and adhesion*, M. Dekker New York, 1982, vol. 188.
- 14 A. Burdzik, M. Stähler, M. Carmo and D. Stolten, *Int. J. Adhes. Adhes.*, 2018, **82**, 1–7.
- 15 B. Jańczuk, T. Białopiotrowicz and A. Zdziennicka, *J. Colloid Interface Sci.*, 1999, **211**, 96–103.
